# Supplementary material for: A procedure for the preparation and isolation of nucleoside-5’-diphosphates
Source: PubMed Central journal article supplement (PMC4419508; doi:10.3762/bjoc.11.52), 2015-04-10
Supplement: Beilstein_J_Org_Chem-11-469-s001.pdf [file Beilstein_J_Org_Chem-11-469-s001.pdf]

**Supporting Information**  
**for**  
**A Procedure for the Preparation and Isolation of**  
**Nucleoside-5'-Diphosphates**

Heidi J. Korhonen<sup>1,2</sup>, Hannah L. Bolt<sup>1</sup> and David R. W. Hodgson\*<sup>1</sup>

Address: <sup>1</sup>Department of Chemistry, Science Laboratories, Durham University, South Road, Durham, DH1 3LE, United Kingdom, and <sup>2</sup>Department of Chemistry, Vatselankatu 2, 20014, University of Turku, Finland.

Email: David R. W. Hodgson - [d.r.w.hodgson@durham.ac.uk](mailto:d.r.w.hodgson@durham.ac.uk)

\*Corresponding author

**Experimental procedures for the preparation of 5'-tosylates and their <sup>1</sup>H and <sup>13</sup>C NMR spectra, and <sup>31</sup>P and <sup>1</sup>H NMR spectra of NDPs**

## Contents

|                                                                                                     |     |
|-----------------------------------------------------------------------------------------------------|-----|
| The Preparation of 5'-Tosylates.....                                                                | s3  |
| <sup>1</sup> H NMR of 5'- <i>O</i> -tosylthymidine ( <b>1a</b> ).....                               | s4  |
| <sup>13</sup> C NMR of 5'- <i>O</i> -tosylthymidine ( <b>1a</b> ).....                              | s5  |
| <sup>1</sup> H NMR of 5'- <i>O</i> -tosyluridine ( <b>1b</b> ).....                                 | s6  |
| <sup>13</sup> C NMR of 5'- <i>O</i> -tosyluridine ( <b>1b</b> ).....                                | s7  |
| <sup>1</sup> H NMR of 2'-deoxy-5'- <i>O</i> -tosyladenosine ( <b>1c</b> ).....                      | s8  |
| <sup>13</sup> C NMR of 2'-deoxy-5'- <i>O</i> -tosyladenosine ( <b>1c</b> ).....                     | s9  |
| <sup>1</sup> H NMR of 2',3'- <i>O</i> -isopropylidene-5'- <i>O</i> -tosyluridine ( <b>3</b> ).....  | s10 |
| <sup>13</sup> C NMR of 2',3'- <i>O</i> -isopropylidene-5'- <i>O</i> -tosyluridine ( <b>3</b> )..... | s11 |
| <sup>31</sup> P NMR of crude TDP reaction mixture .....                                             | s12 |
| <sup>31</sup> P NMR of thymidine 5'-diphosphate ( <b>2a</b> ) .....                                 | s13 |
| <sup>1</sup> H NMR of thymidine 5'-diphosphate ( <b>2a</b> ) .....                                  | s14 |
| <sup>31</sup> P NMR of uridine 5'-diphosphate ( <b>2b</b> ) .....                                   | s15 |
| <sup>1</sup> H NMR of uridine 5'-diphosphate ( <b>2b</b> ) .....                                    | s16 |
| <sup>31</sup> P NMR of 2'-deoxyadenosine 5'-diphosphate ( <b>2c</b> ) .....                         | s17 |
| <sup>1</sup> H NMR of 2'-deoxyadenosine 5'-diphosphate ( <b>2c</b> ).....                           | s18 |
| <sup>31</sup> P NMR of adenosine 5'-diphosphate ( <b>2d</b> ).....                                  | s19 |
| <sup>1</sup> H NMR of adenosine 5'-diphosphate ( <b>2d</b> ).....                                   | s20 |
| References .....                                                                                    | s21 |

## The Preparation of 5'-Tosylates

2',3'-O-Isopropylideneuridine and 5'-tosyladenosine **1d** were purchased from Carbosynth and used as received. 5'-tosylthymidine was synthesized according to a literature procedure [1] to give **1a** as a white powder (1.70 g, 51%). 2'-Deoxy-5'-tosyladenosine **1c** was prepared from 2'-deoxyadenosine hydrate via a published procedure [2] to yield 1.97 g (60%) of **1c**.

2',3'-O-Isopropylidene-5'-O-tosyluridine **3**: p-toluenesulfonyl chloride (1.34 g, 7.00 mmol) was dissolved in pyridine (5 ml) and added dropwise to a solution of 2',3'-O-isopropylideneuridine (1.60 g, 5.63 mmol) in dry pyridine (10 ml) at 0 °C, and the mixture was stirred at 0 °C for 2 h. The mixture was added to an ice/water mixture (100 ml), stirred for 20 min. and extracted with ethyl acetate (2 × 120 ml). The organic layers were combined and washed with saturated sodium hydrogen carbonate solution (2 × 20 ml) and distilled water (2 × 20 ml), and dried over magnesium sulfate. The solution was filtered, the solvent removed *in vacuo*, and the residue was subjected to silica gel chromatography (CH<sub>2</sub>Cl<sub>3</sub>:MeOH, 50:1) to yield 1.62 g (65%) of 2',3'-O-isopropylidene-5'-O-toluenesulfonyluridine. <sup>1</sup>H and <sup>13</sup>C NMR spectra correspond to data in the literature [3,4].

5'-O-Tosyluridine **1b**: 2',3'-O-isopropylidene-5'-O-toluenesulfonyluridine (0.740 g, 1.69 mmol) was stirred in 90% TFA in water (2 ml) for 10 min. The solvent was removed *in vacuo* and the product was isolated by silica gel chromatography (CH<sub>2</sub>Cl<sub>2</sub>:MeOH, 9:1) to yield 0.483 g (71%) of 5'-O-tosyluridine. <sup>1</sup>H and <sup>13</sup>C NMR spectra correspond to data in the literature [1].

**<sup>1</sup>H NMR of 5'-O-tosylthymidine (1a)**

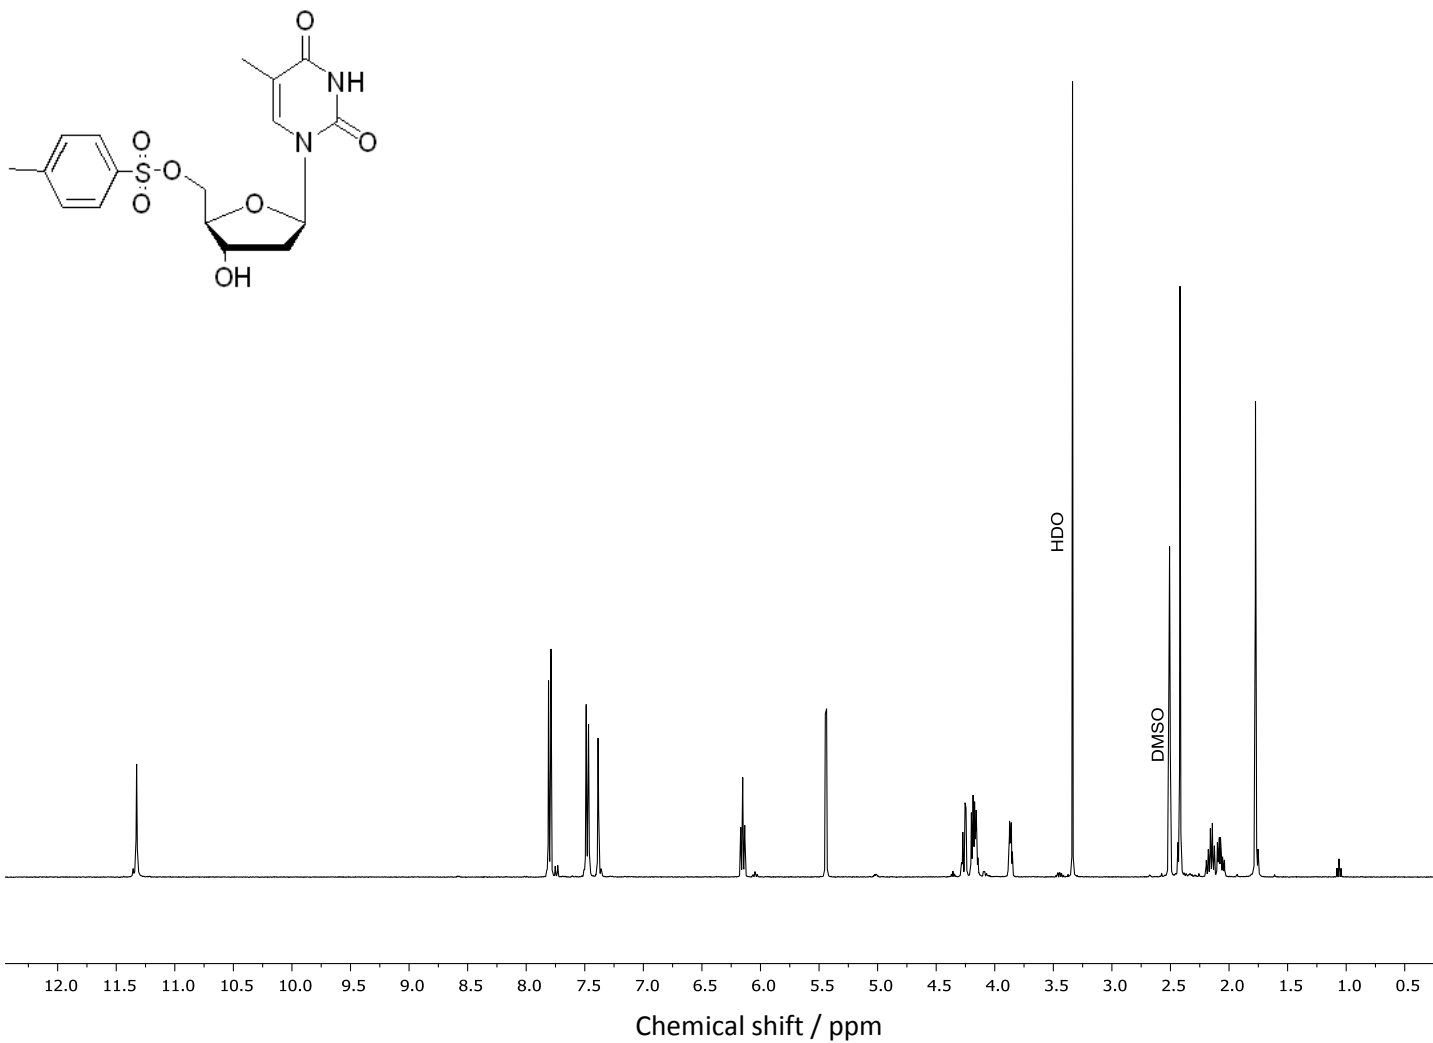

<sup>13</sup>C NMR of 5'-O-tosylthymidine (1a)

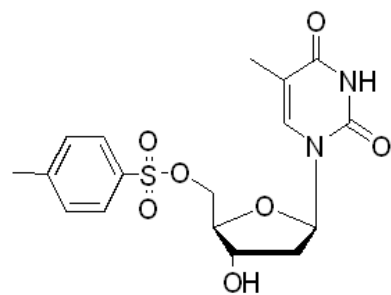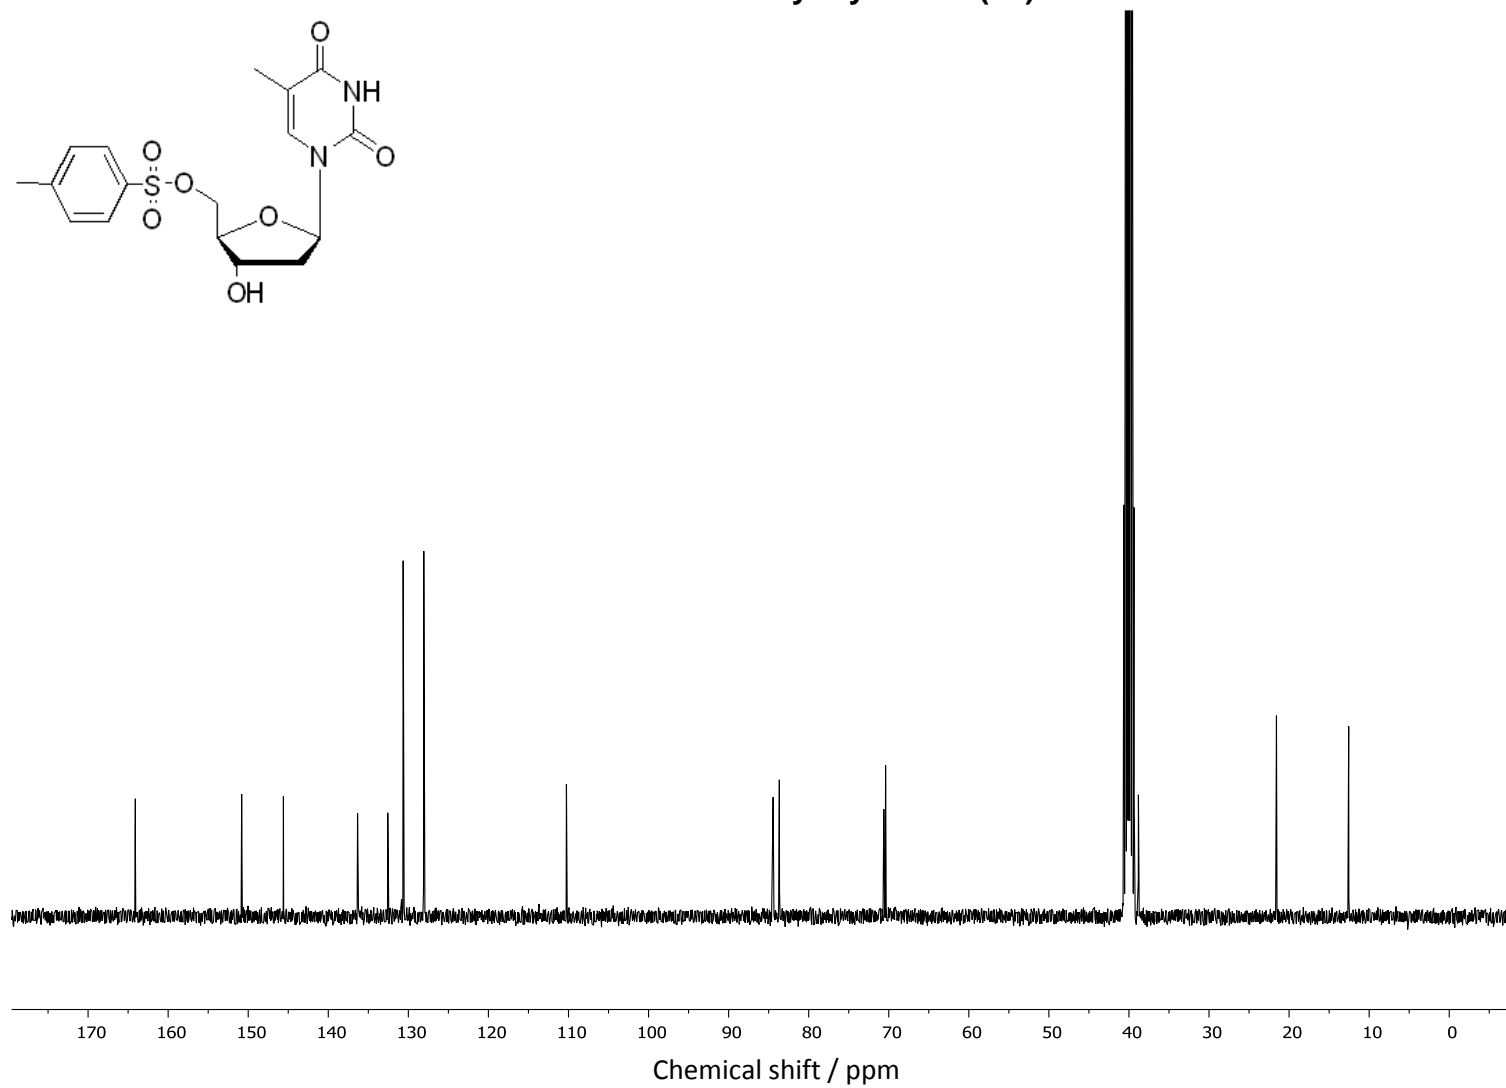

# <sup>1</sup>H NMR of 5'-O-tosyluridine (1b)

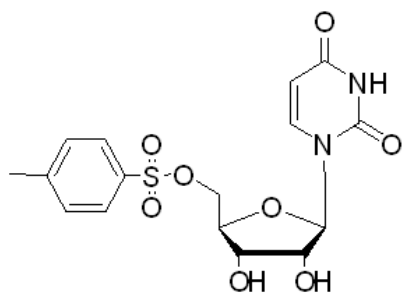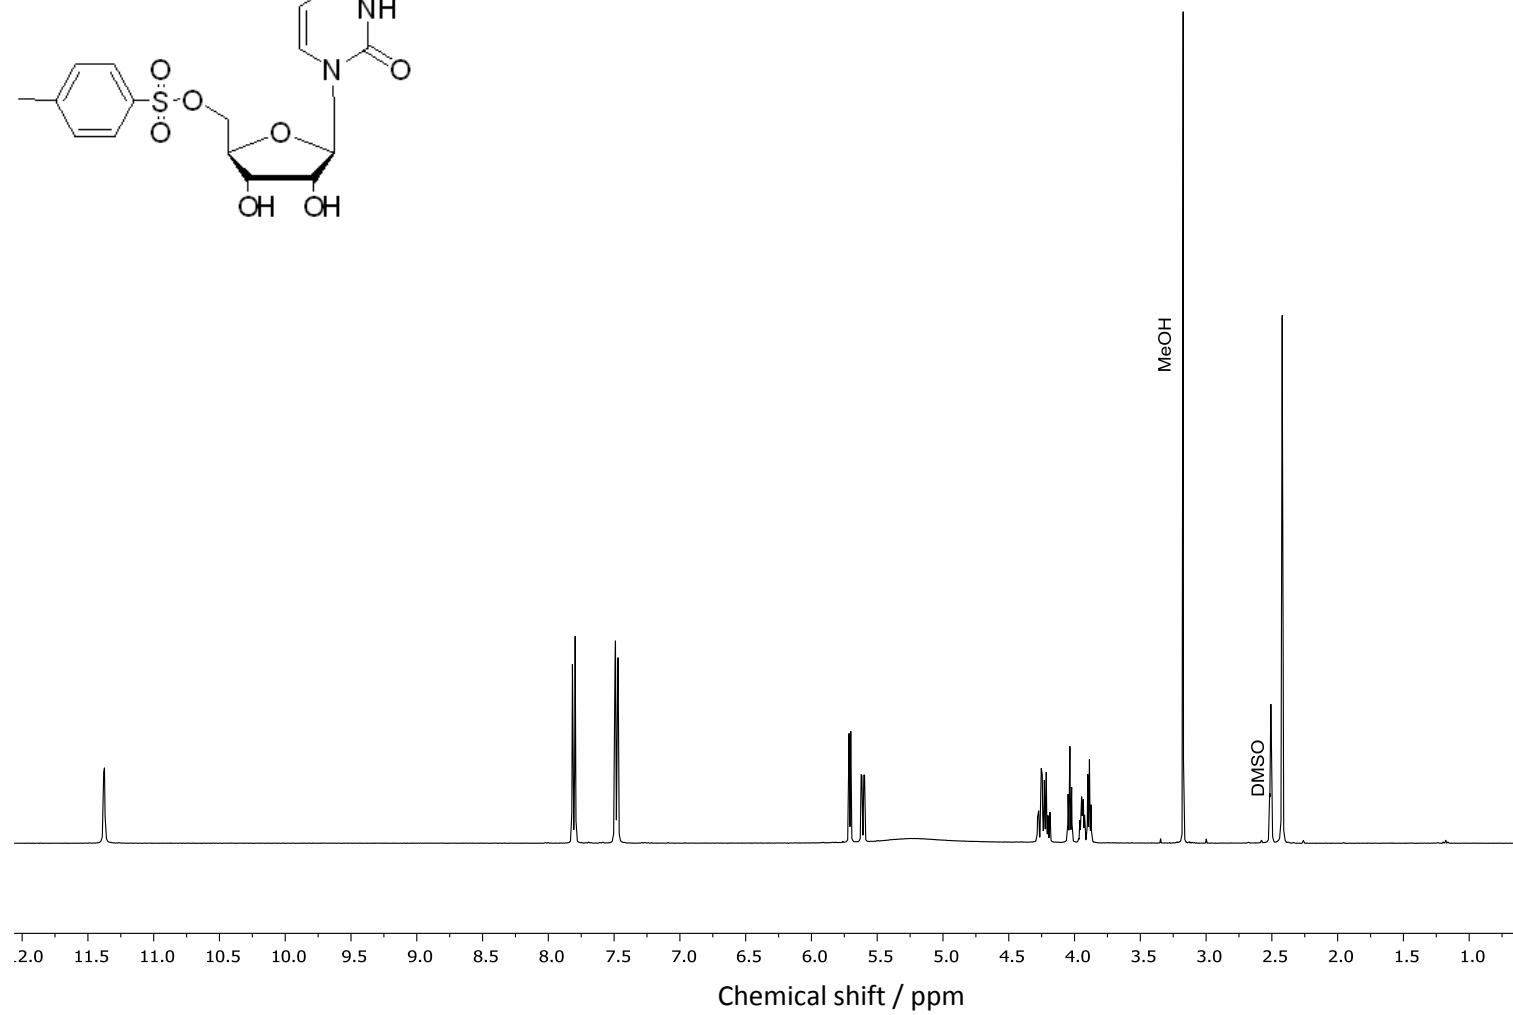

<sup>13</sup>C NMR of 5'-O-tosyluridine (1b)

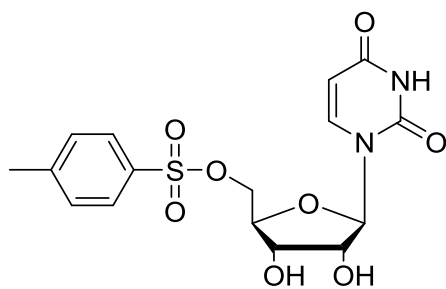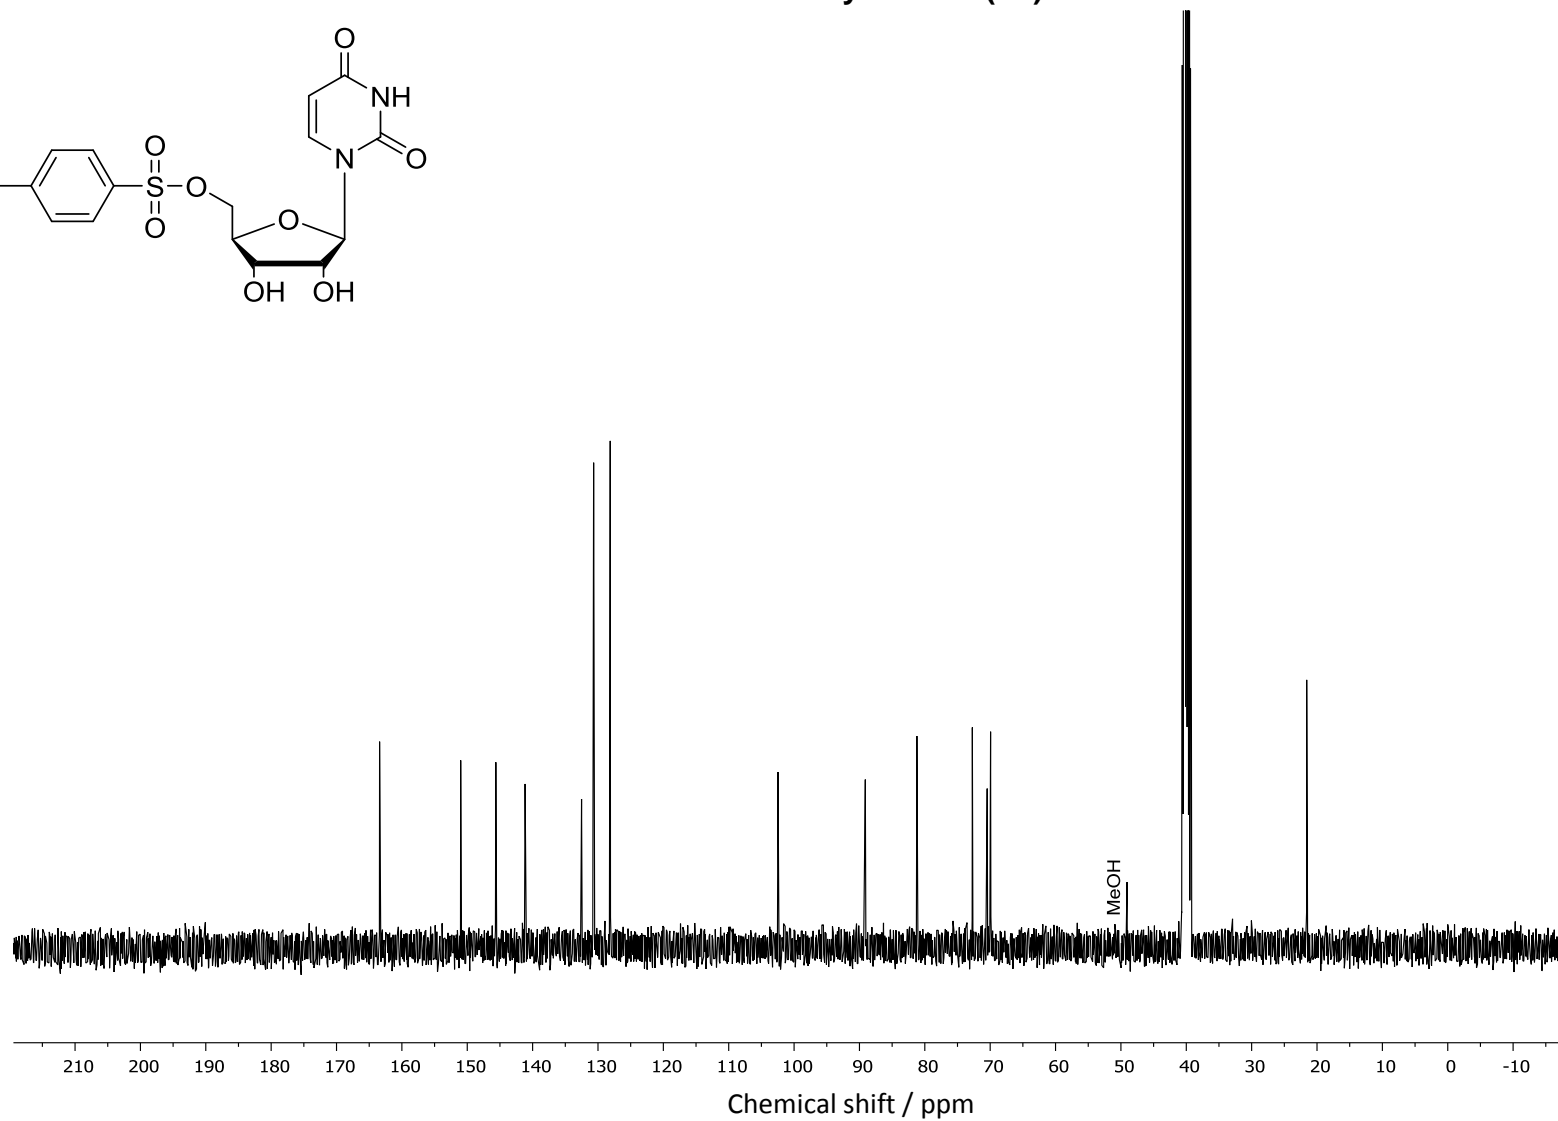

<sup>1</sup>H NMR of 2'-deoxy-5'-O-tosyladenosine (1c)

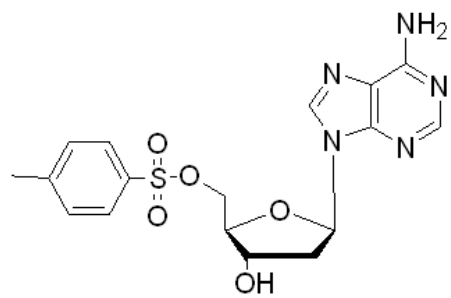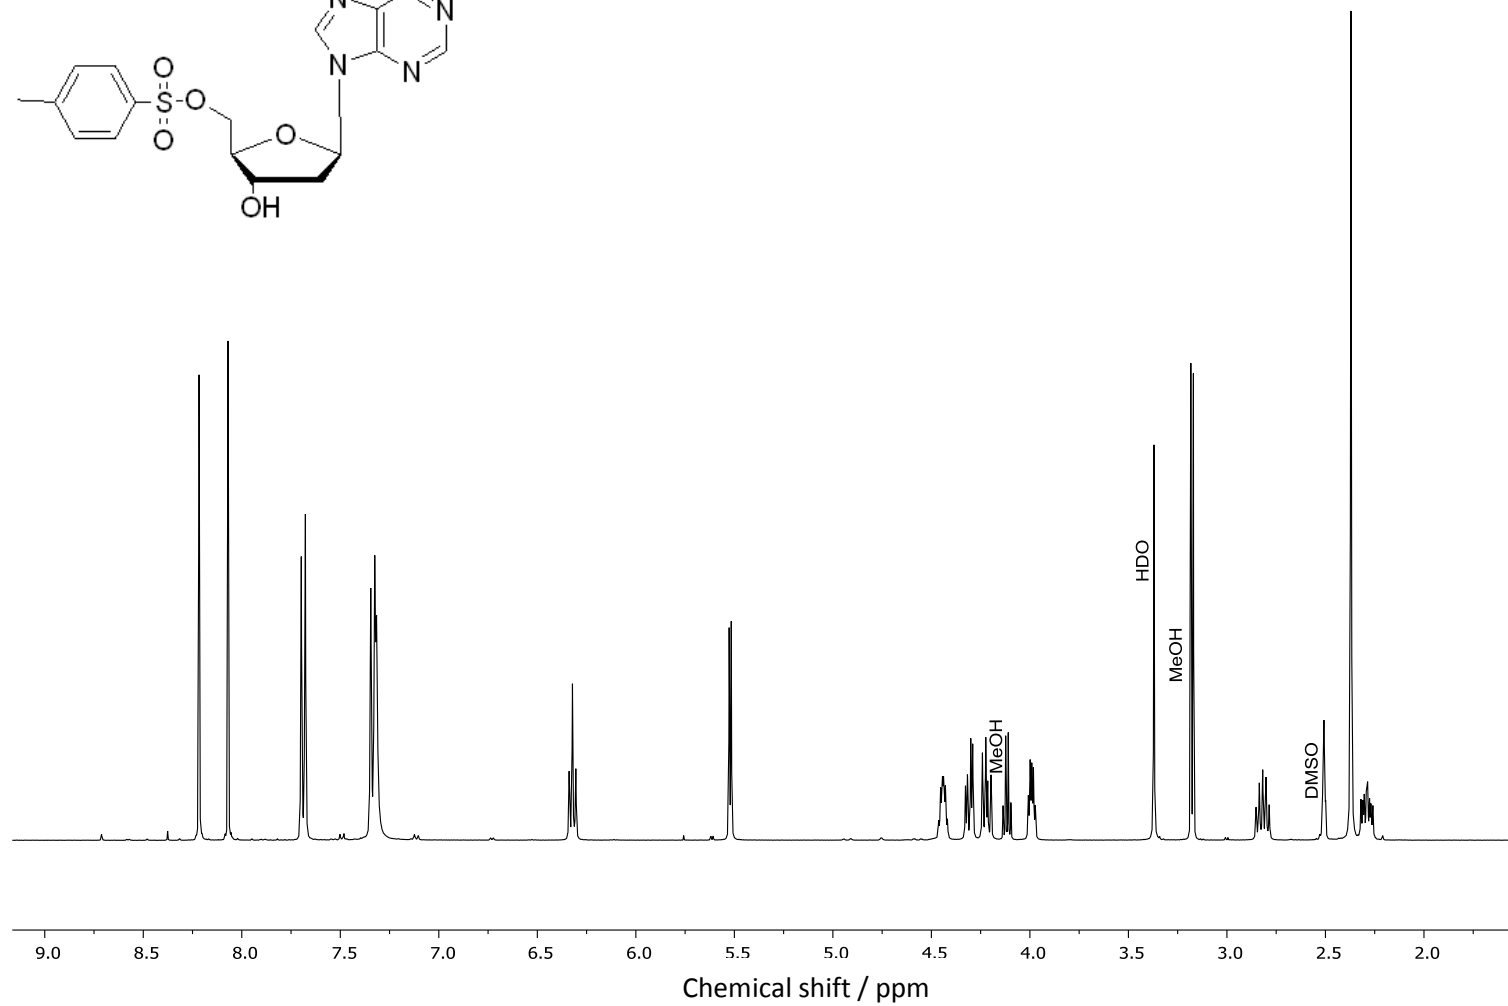



<sup>13</sup>C NMR of 2'-deoxy-5'-O-tosyladenosine (1c)

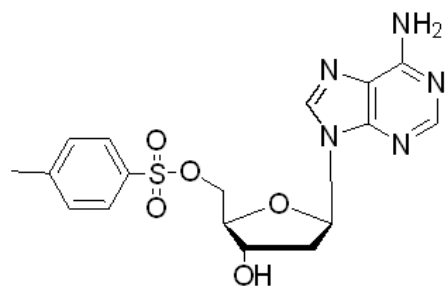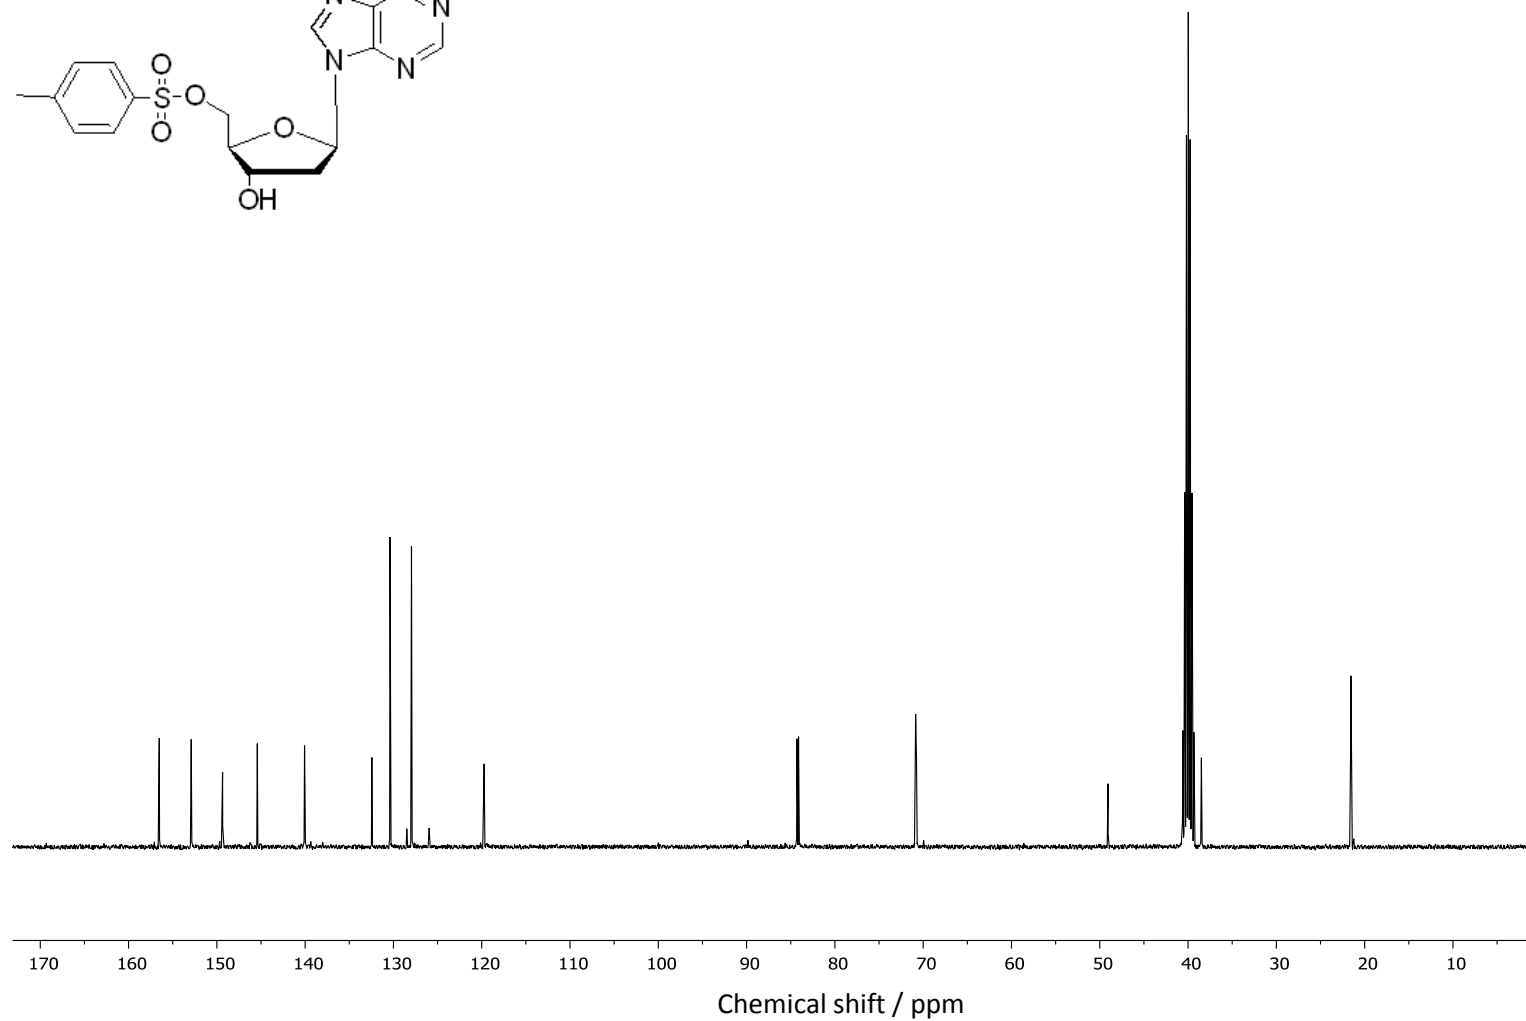



**$^{13}\text{C}$  NMR of 2',3'-O-isopropylidene-5'-O-tosyluridine (3)**

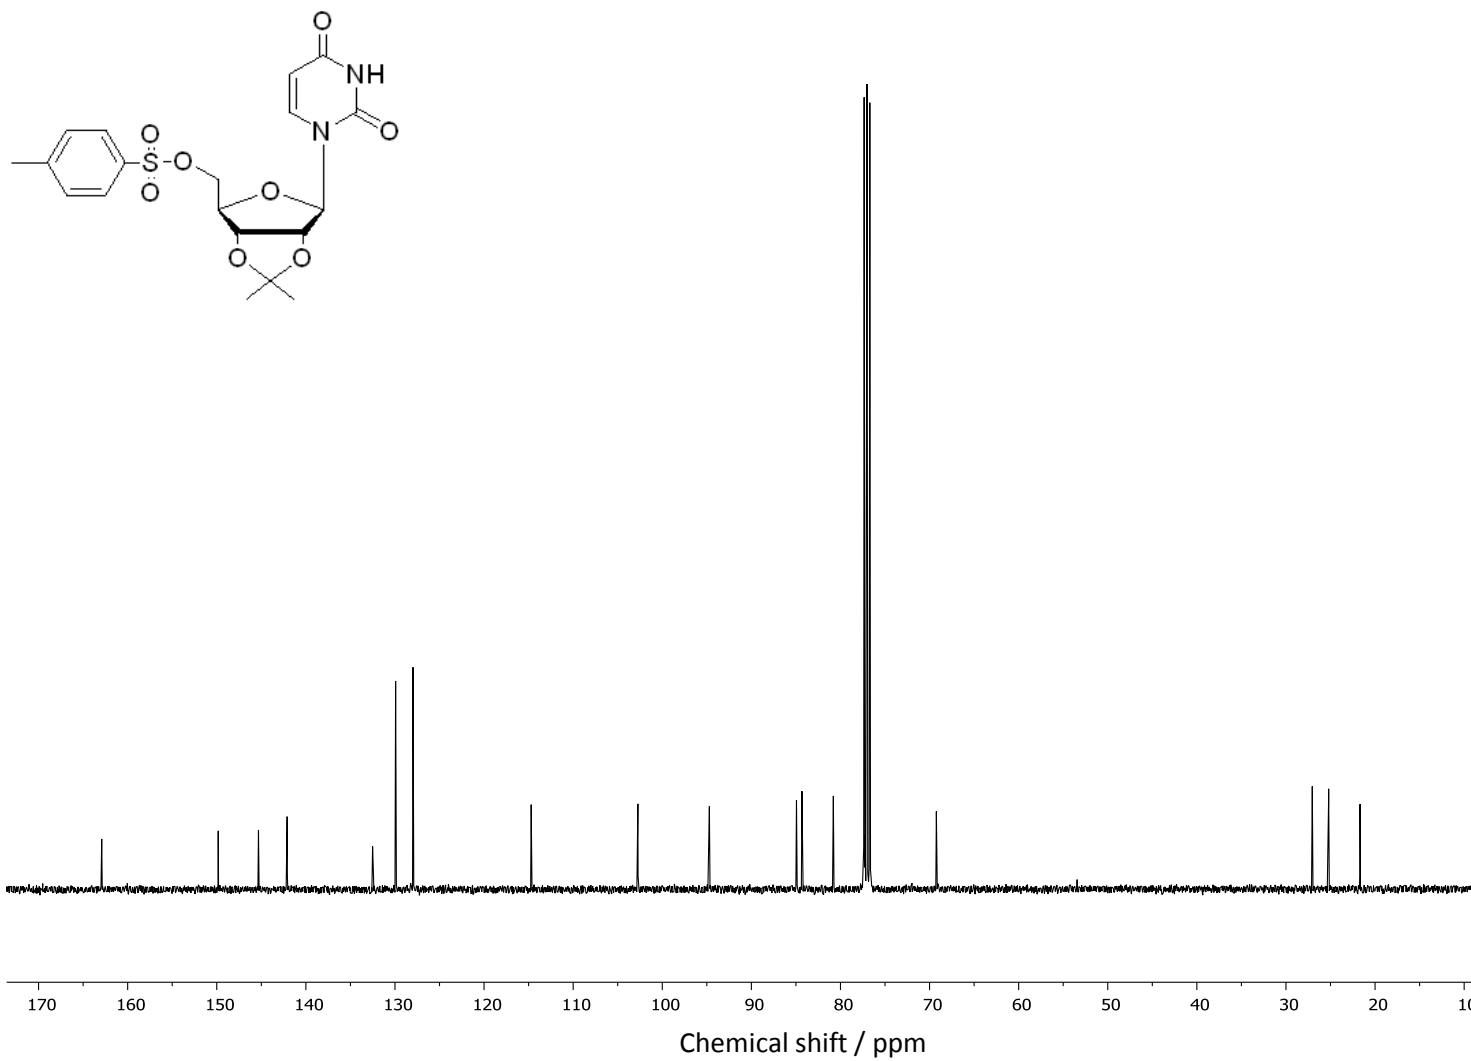

### <sup>31</sup>P NMR of crude TDP reaction mixture

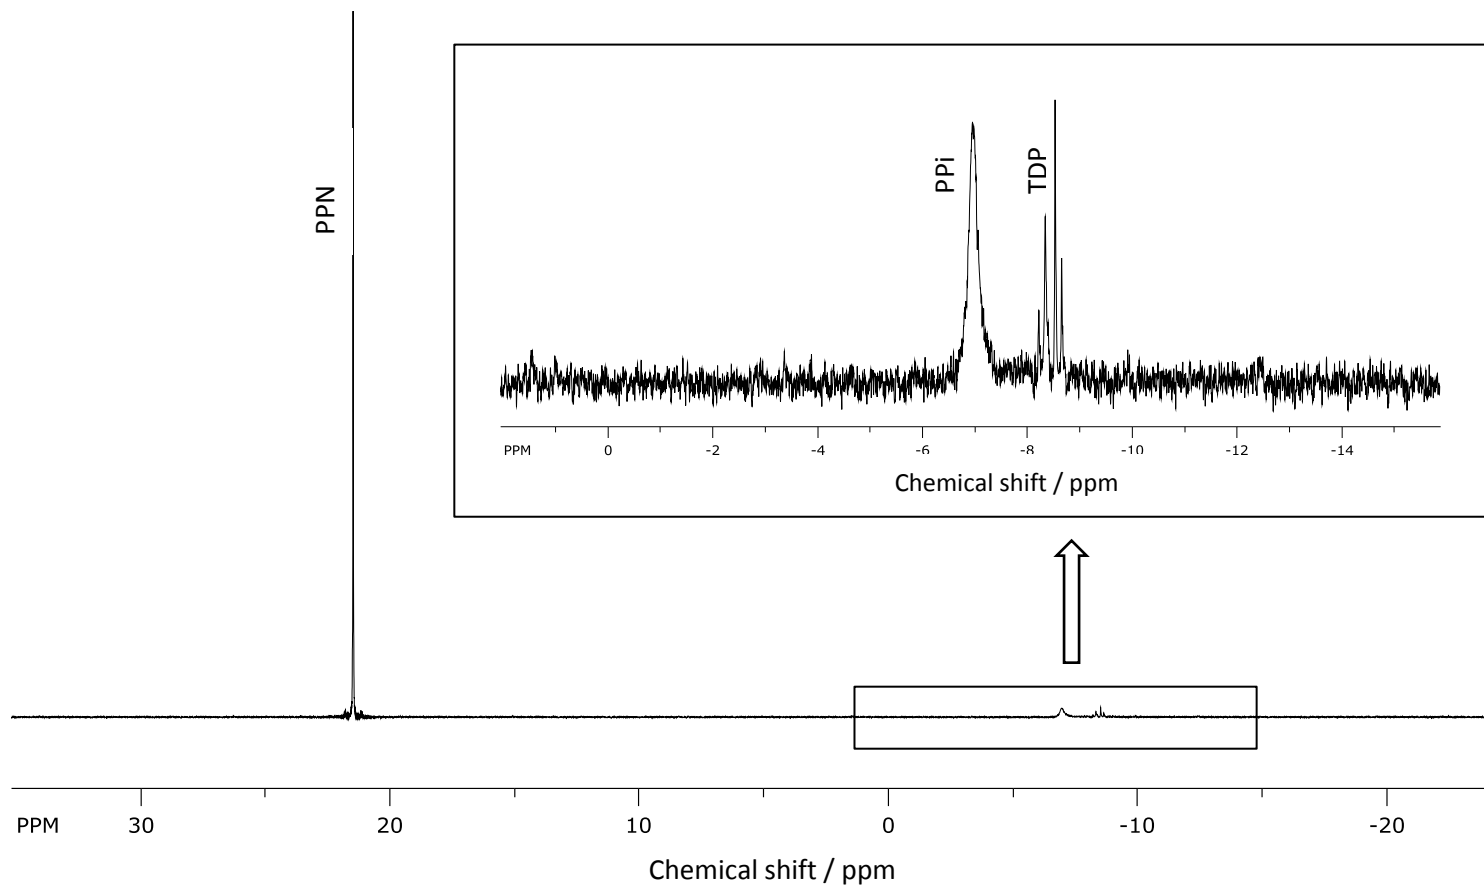

### <sup>31</sup>P NMR of thymidine 5'-diphosphate (2a)

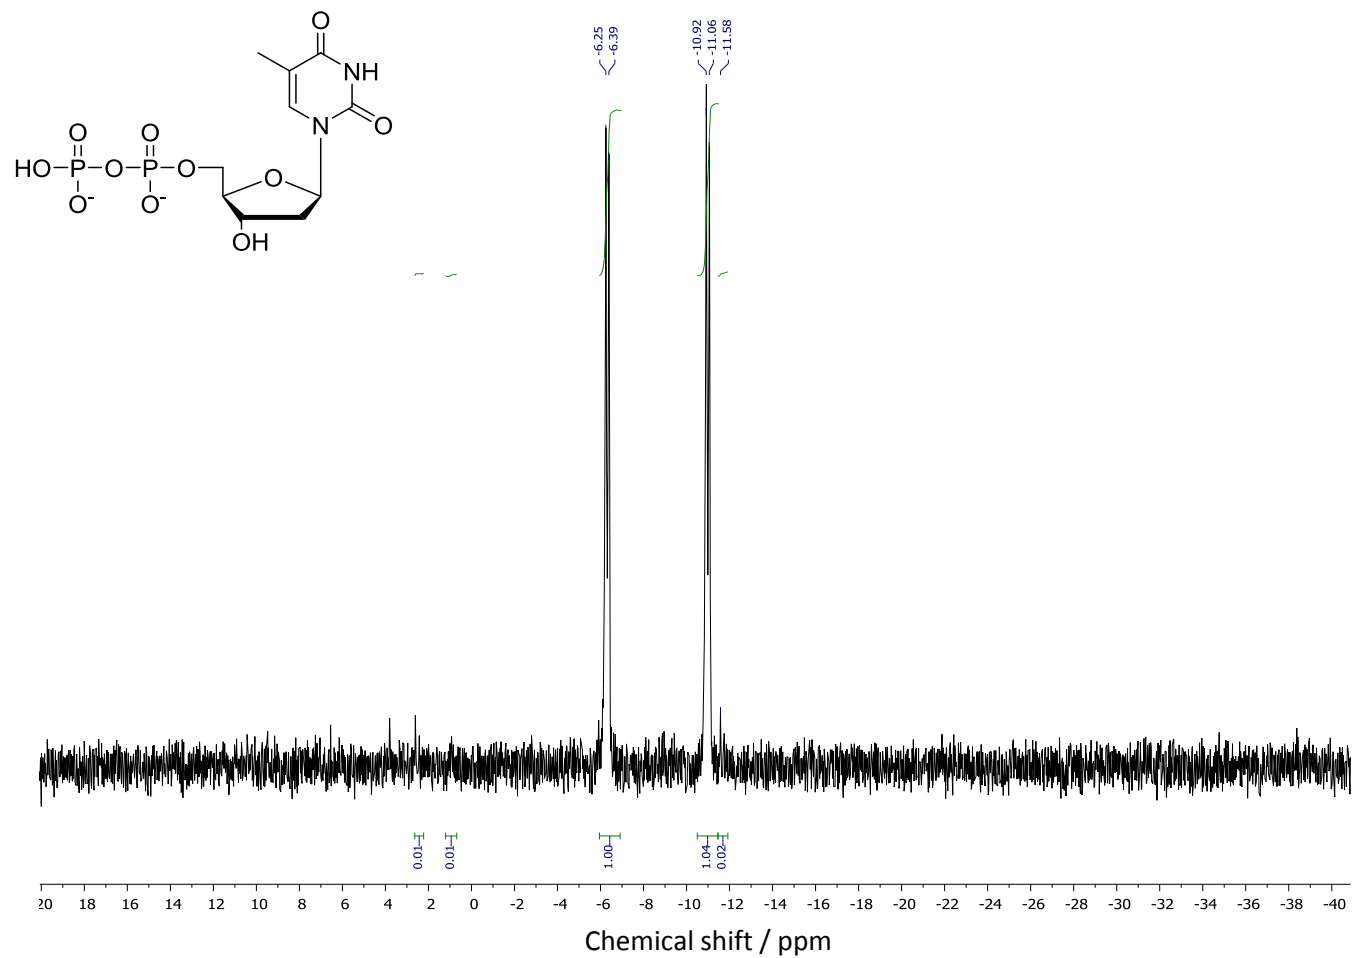

# <sup>1</sup>H NMR of thymidine 5'-diphosphate (2a)

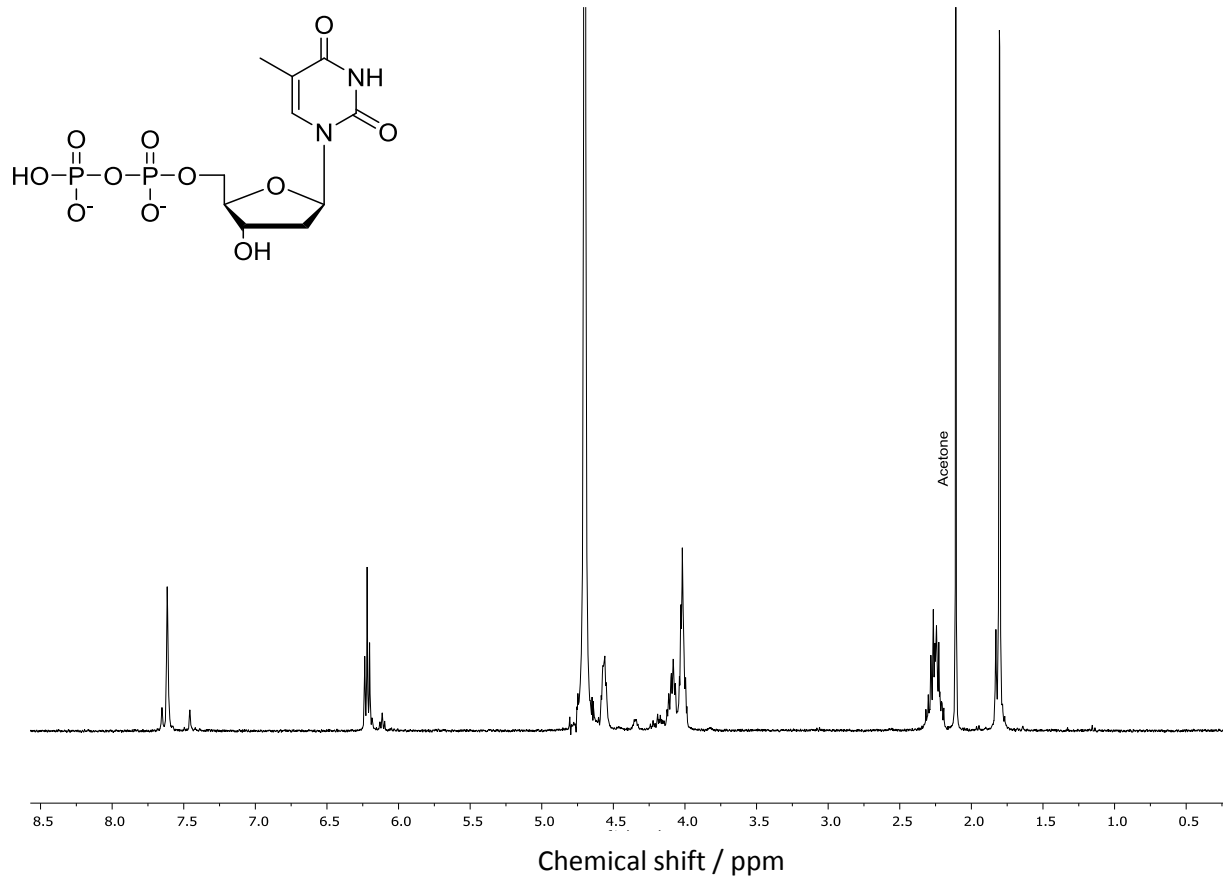

### <sup>31</sup>P NMR of uridine 5'-diphosphate (2b)

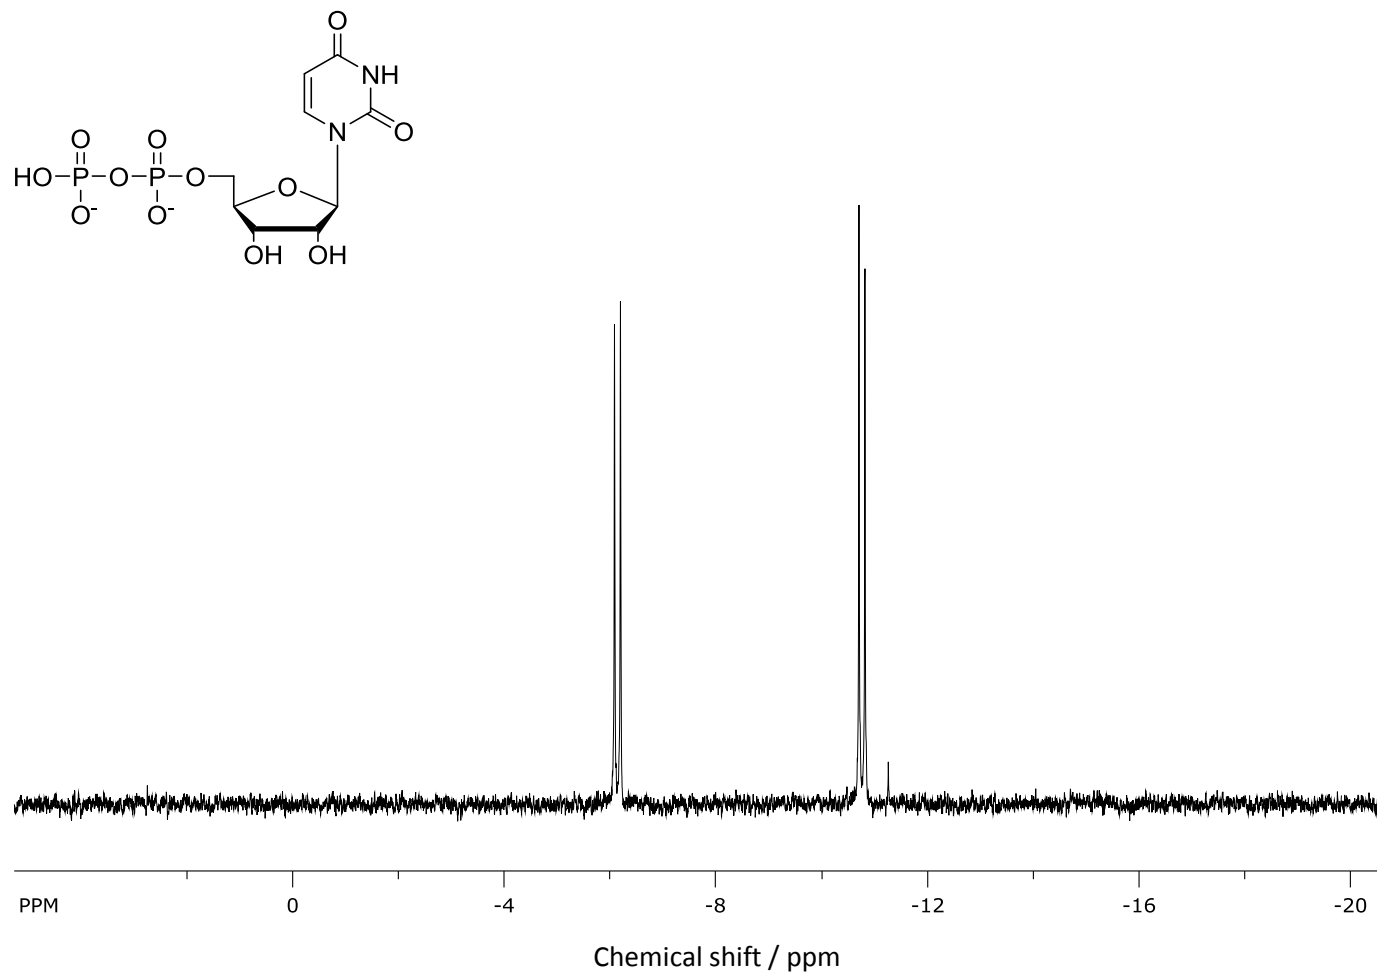

# <sup>1</sup>H NMR of uridine 5'-diphosphate (2b)

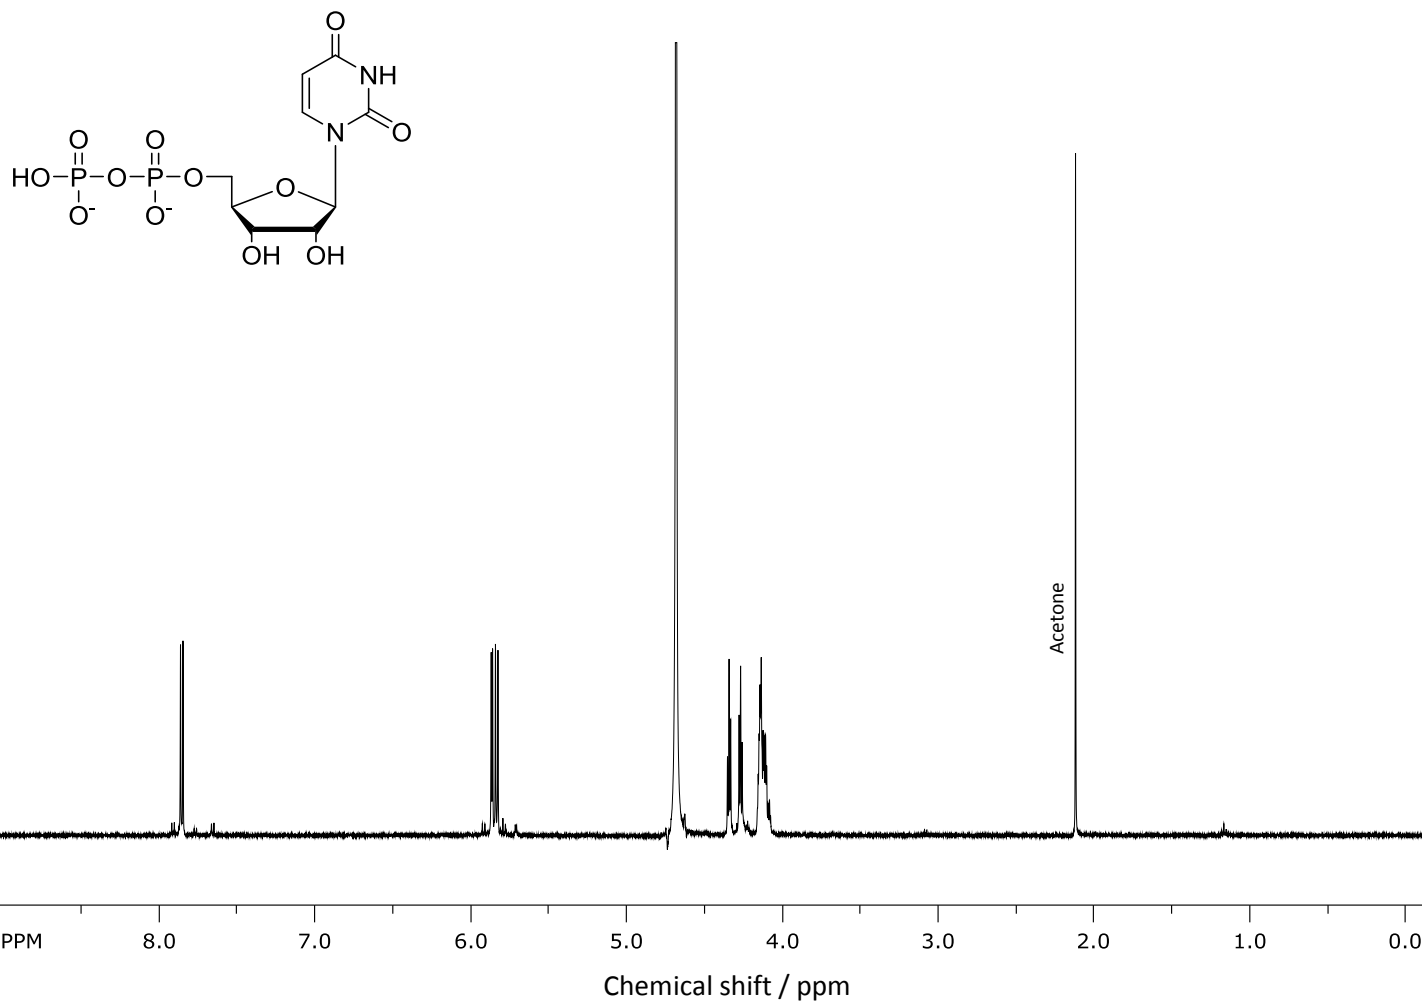



**$^{31}\text{P}$  NMR of 2'-deoxyadenosine 5'-diphosphate (2c)**

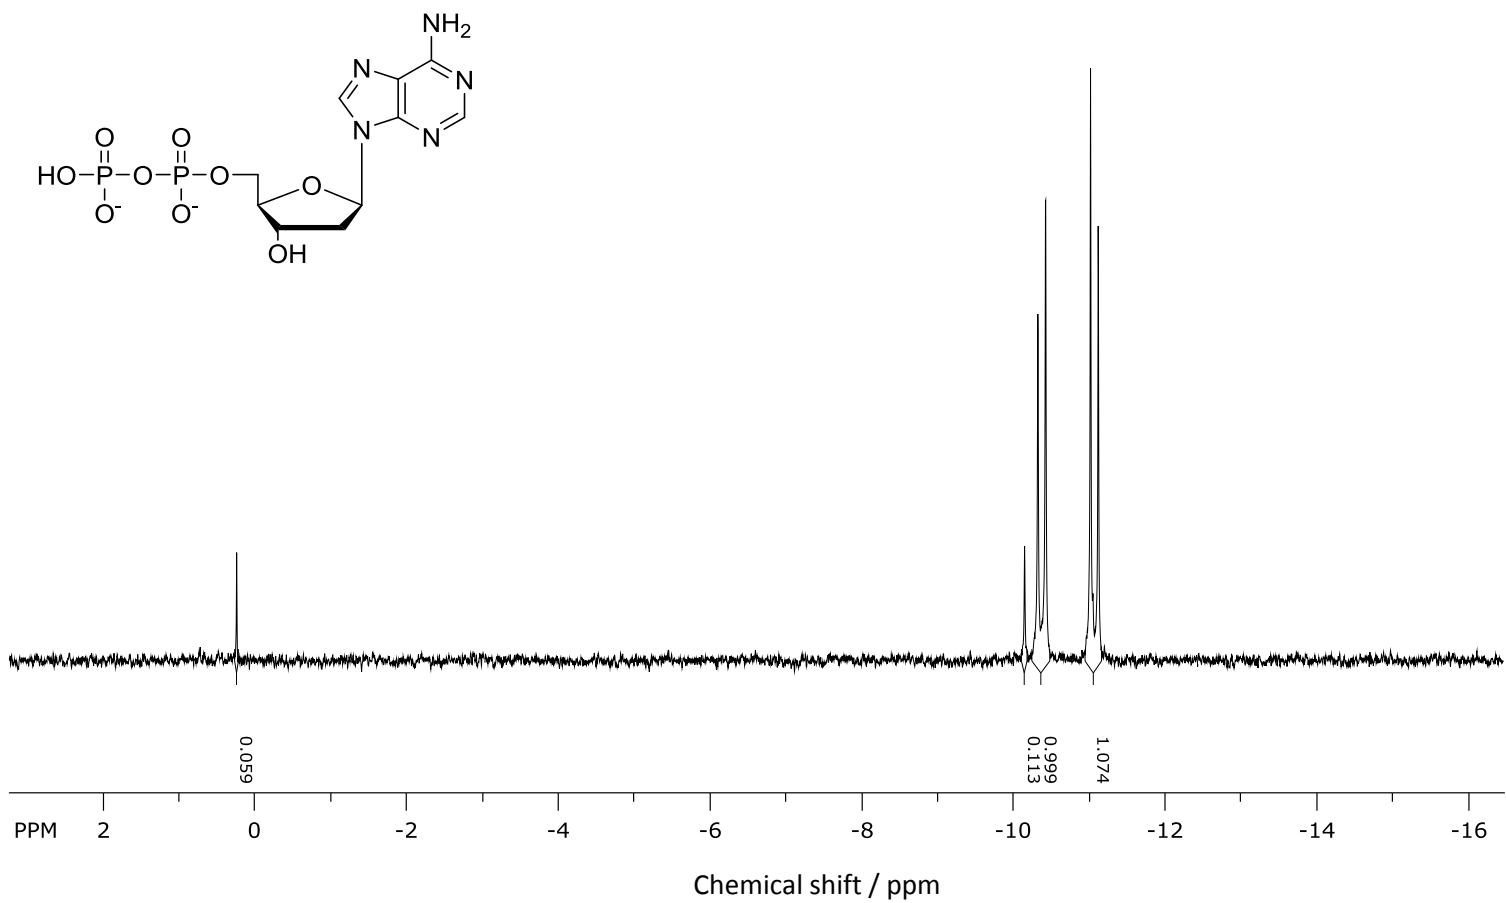

# <sup>1</sup>H NMR of 2'-deoxyadenosine 5'-diphosphate (2c)

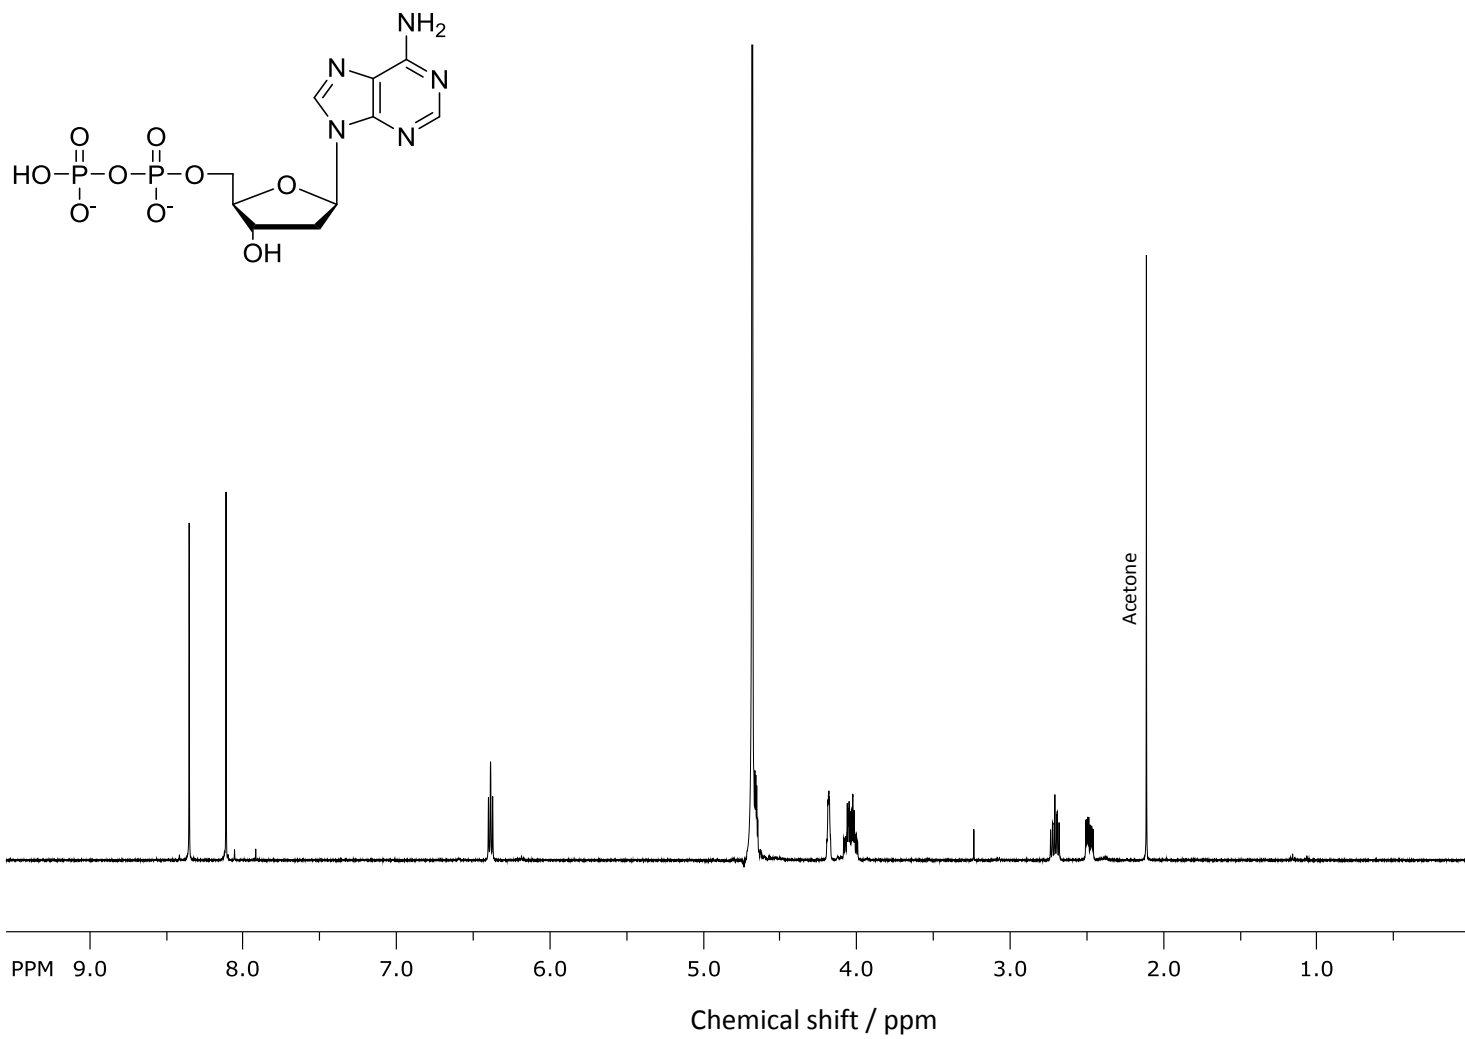

### <sup>31</sup>P NMR of adenosine 5'-diphosphate (2d)

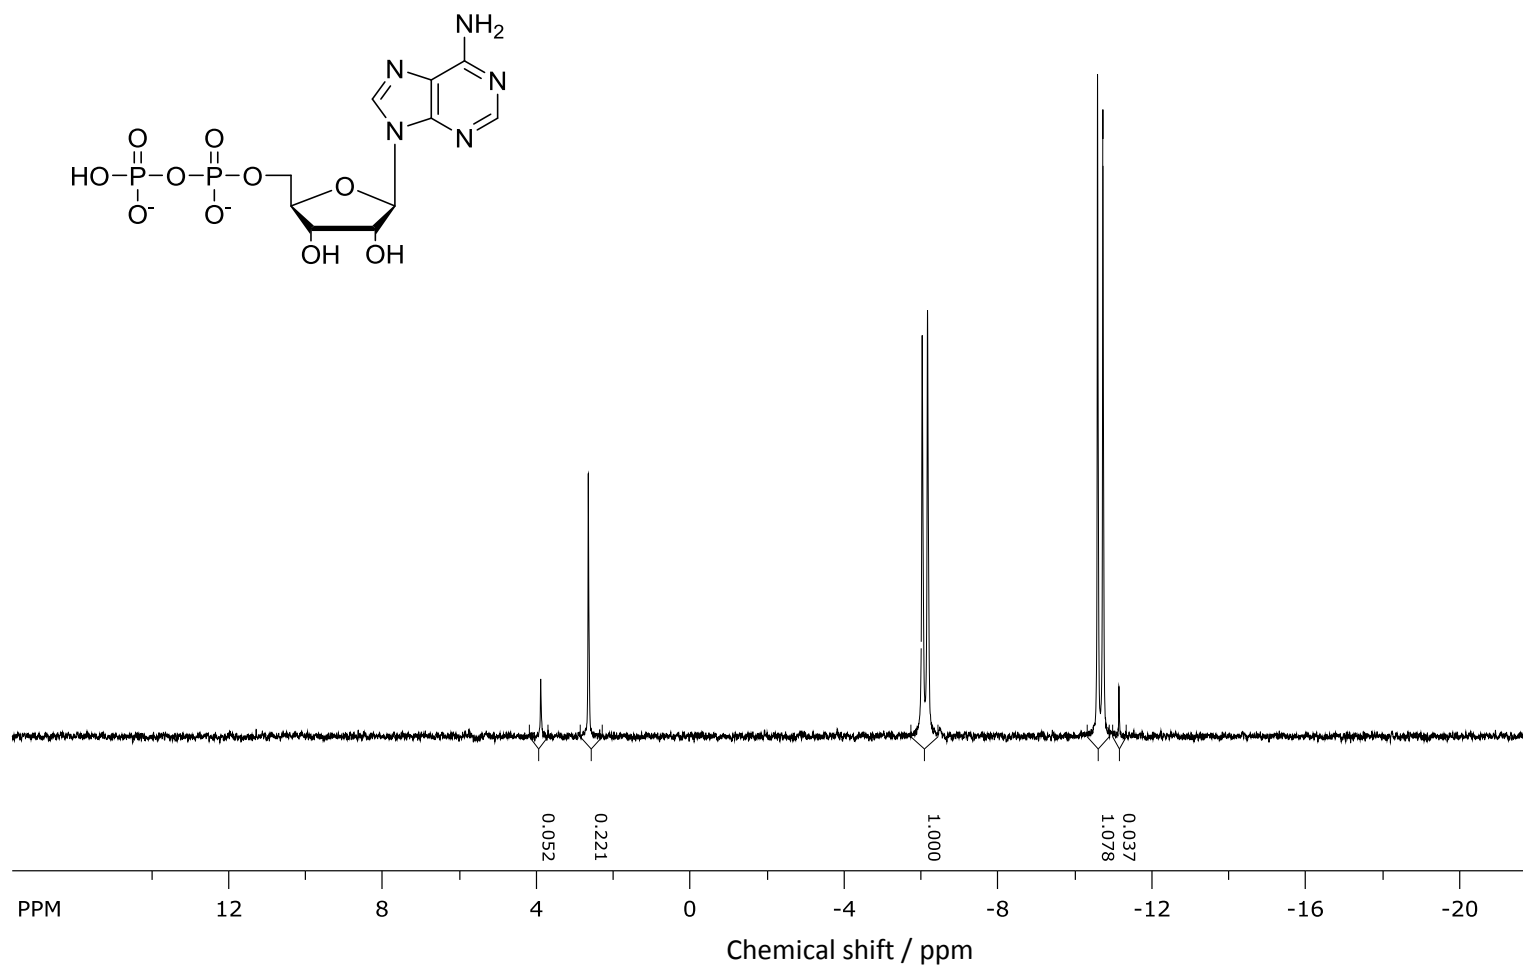

# <sup>1</sup>H NMR of adenosine 5'-diphosphate (2d)

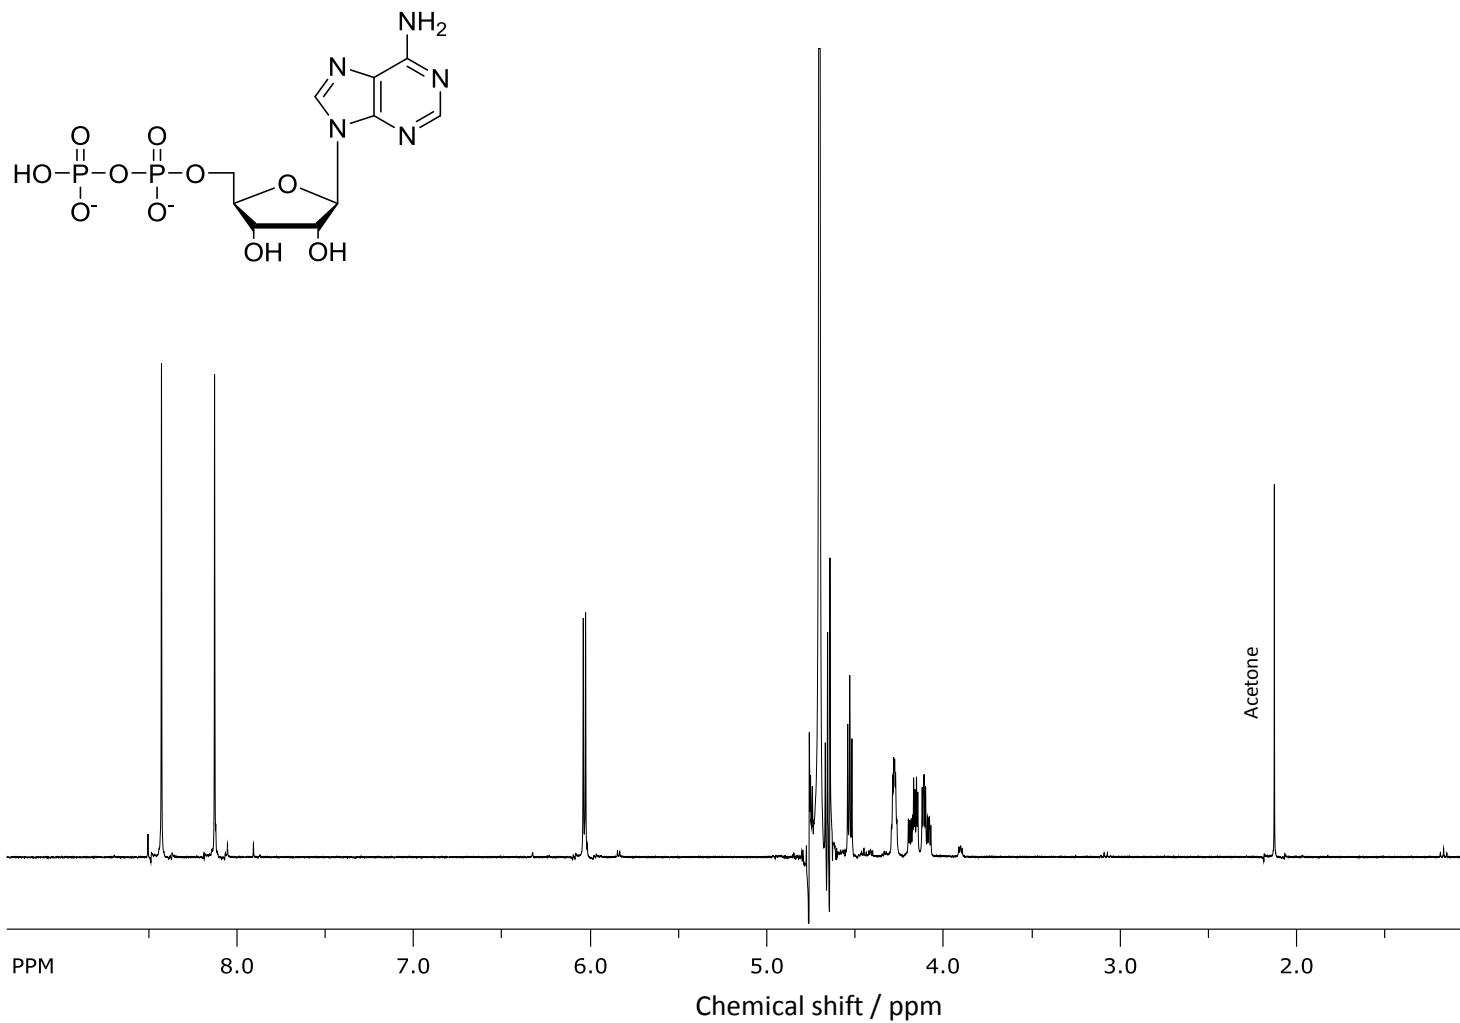

## References

1. Davisson, V. J.; Davis, D. R.; Dixit, V. M.; Poulter, C. D. *J. Org. Chem.* **1987**, *52*, 1794-1801. doi:10.1021/jo00385a026
2. Prakash, G. K. S.; Zibinsky, M.; Upton, T. G.; Kashemirov, B. A.; McKenna, C. E.; Oertell, K.; Goodman, M. F.; Batra, V. K.; Pedersen, L. C.; Beard, W. A.; Shock, D. D.; Wilson, S. H.; Olah, G. A. *Proc. Natl. Acad. Sci. U.S.A.* **2010**, *107*, 15693-15698. doi:10.1073/Pnas.1007430107
3. Winans, K. A.; Bertozzi, C. R. *Chem. Biol.* **2002**, *9*, 113-129. doi:10.1016/S1074-5521(02)00093-5
4. Wang, R.; Steensma, D. H.; Takaoka, Y.; Yun, J. W.; Kajimoto, T.; Wong, C. H. *Bioorg. Med. Chem.* **1997**, *5*, 661-672. doi:10.1016/S0968-0896(97)00005-9
